# Supplementary material for: Atmospheric CO 2 exchanges measured by Eddy Covariance over a temperate salt marsh and influence of environmental controlling factors
Source: Copernicus journal article supplement (doi:10.5194/egusphere-2023-1641), 2023-07-20
Supplement: Supplementary file 1 [file egusphere-2023-1641-supplement-version2.pdf]

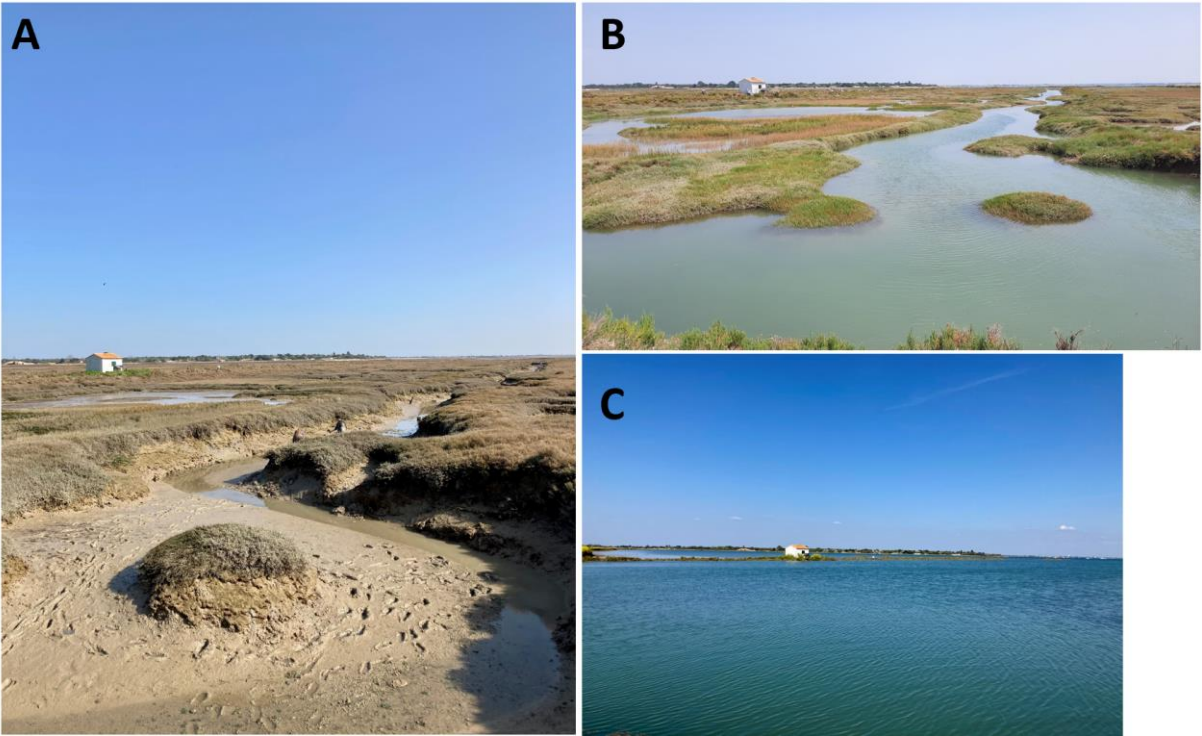

**Fig. S1. Pictures of the Bossys perdus salt marsh during emersion (A; 01/03/2021 15:00, Hw = 0 m) and immersion (B, 22/07/2021 13:00, Hw = 0.3 m; C, 27/04/2021 16:00, Hw = 1.8 m). Picture A was taken at low tide when all the marsh plants were emerged into the atmosphere. During this time, the channel drains the upstream marsh waters to the estuary. Picture B was taken during incoming tide when advected coastal waters completely fill the channel and immerse the marsh. Picture C was taken at high tide during the highest tidal amplitude when all the marsh plants were immersed by coastal waters. Water heights (Hw) were measured from the STPS sensor located on the salt marsh and not in the channel (see M&M section and Fig. 2). © P. Polsenaere.**

30

**Table S1. Performance indicators for each model (RF: Random Forest, ANN: Artificial Neural Network) tested to gap fill the CO<sub>2</sub> fluxes. Predictor variables are PAR (Photosynthetically active radiation,  $\mu\text{mol m}^{-2} \text{s}^{-1}$ ), Ta (air temperature, °C), Hw (water height, m), RH (Relative Humidity, %) and Vd (wind direction,  $\text{m s}^{-1}$ ). The performance indicators are the coefficient of linear determination Pearson which shows the level of variability captured by the model ( $R^2$ ), the racine of the error quadratic average which gives an overview of the uncertainty of the result (RMSE: Root Mean Square Error), as well as the bias of the model.**

| Models | Predictor variable | RMSE | Bias    | $R^2$ |
|--------|--------------------|------|---------|-------|
| RF1    | PAR, Ta, Hw        | 1.42 | 0.0039  | 0.85  |
| RF2    | PAR, Ta, Hw, RH    | 1.27 | 0.0024  | 0.88  |
| RF3    | PAR, Ta, Hw, Vd    | 1.19 | 0.0029  | 0.90  |
| ANN1   | PAR, Ta, Hw        | 1.95 | -0.0003 | 0.71  |
| ANN2   | PAR, Ta, Hw, RH    | 1.89 | 0.0021  | 0.73  |
| ANN3   | PAR, Ta, Hw, Vd    | 1.81 | 0.0041  | 0.75  |

35

**Table S2. Estimation of the parameters used for NEE flux partitioning ( $a_1$ ,  $a_2$ ,  $R_0$  and  $b$ ) during emersion at the monthly scale. The  $a_1$  coefficient is directly linked to the phenology of the ecosystem.**

|           | $a_1$  | $a_2$ | $R_0$ | $b$   |
|-----------|--------|-------|-------|-------|
| January   | -7.82  | 370   | 0.34  | 0.04  |
| February  | -9.89  | 435   | 0.64  | -0.03 |
| March     | -9.38  | 506   | 0.17  | 0.15  |
| April     | -12.51 | 787   | 0.24  | 0.12  |
| May       | -13.41 | 812   | 0.35  | 0.10  |
| June      | -14.68 | 846   | 0.68  | 0.06  |
| July      | -14.98 | 934   | 0.84  | 0.05  |
| August    | -17.91 | 1397  | 0.56  | 0.07  |
| September | -16.86 | 1419  | 0.32  | 0.09  |
| October   | -13.08 | 766   | 0.58  | 0.06  |
| November  | -14.37 | 783   | 0.19  | 0.14  |
| December  | -7.60  | 360   | 0.31  | 0.09  |

40 **Table S3. Monthly mean ( $\mu\text{mol CO}_2 \text{ m}^{-2} \text{ s}^{-1}$ ) and monthly cumulative ( $\text{g C m}^{-2} \text{ month}^{-1}$ ) fluxes of the measured NEE and estimated  $\text{NEE}_{\text{marsh}}$  during marsh emersion periods (Hw = 0 m). These comparisons between measured NEE and estimated  $\text{NEE}_{\text{marsh}}$  only during marsh emersion allowed to confirm the correct NEE flux partitioning (see M&M section).**

|           | Mean NEE<br>( $\mu\text{mol CO}_2 \text{ m}^{-2} \text{ s}^{-1}$ ) | Mean $\text{NEE}_{\text{marsh}}$<br>( $\mu\text{mol CO}_2 \text{ m}^{-2} \text{ s}^{-1}$ ) | Cumulative NEE<br>( $\text{g C m}^{-2}$ ) | Cumulative $\text{NEE}_{\text{marsh}}$<br>( $\text{g C m}^{-2}$ ) |
|-----------|--------------------------------------------------------------------|--------------------------------------------------------------------------------------------|-------------------------------------------|-------------------------------------------------------------------|
| January   | -0.75                                                              | -0.77                                                                                      | -18.2                                     | -18.7                                                             |
| February  | -1.55                                                              | -1.56                                                                                      | -34.8                                     | -35.0                                                             |
| March     | -1.53                                                              | -1.53                                                                                      | -37.3                                     | -37.3                                                             |
| April     | -1.95                                                              | -1.93                                                                                      | -45.2                                     | -44.9                                                             |
| May       | -2.16                                                              | -2.16                                                                                      | -53.0                                     | -53.2                                                             |
| June      | -2.29                                                              | -2.30                                                                                      | -50.6                                     | -50.9                                                             |
| July      | -2.34                                                              | -2.33                                                                                      | -57.7                                     | -57.6                                                             |
| August    | -1.24                                                              | -1.27                                                                                      | -29.9                                     | -30.6                                                             |
| September | -1.14                                                              | -1.13                                                                                      | -27.2                                     | -26.9                                                             |
| October   | -0.80                                                              | -0.80                                                                                      | -18.4                                     | -18.4                                                             |
| November  | -0.63                                                              | -0.61                                                                                      | -14.8                                     | -14.4                                                             |
| December  | -0.40                                                              | -0.40                                                                                      | -6.3                                      | -6.2                                                              |

45

50

55

60

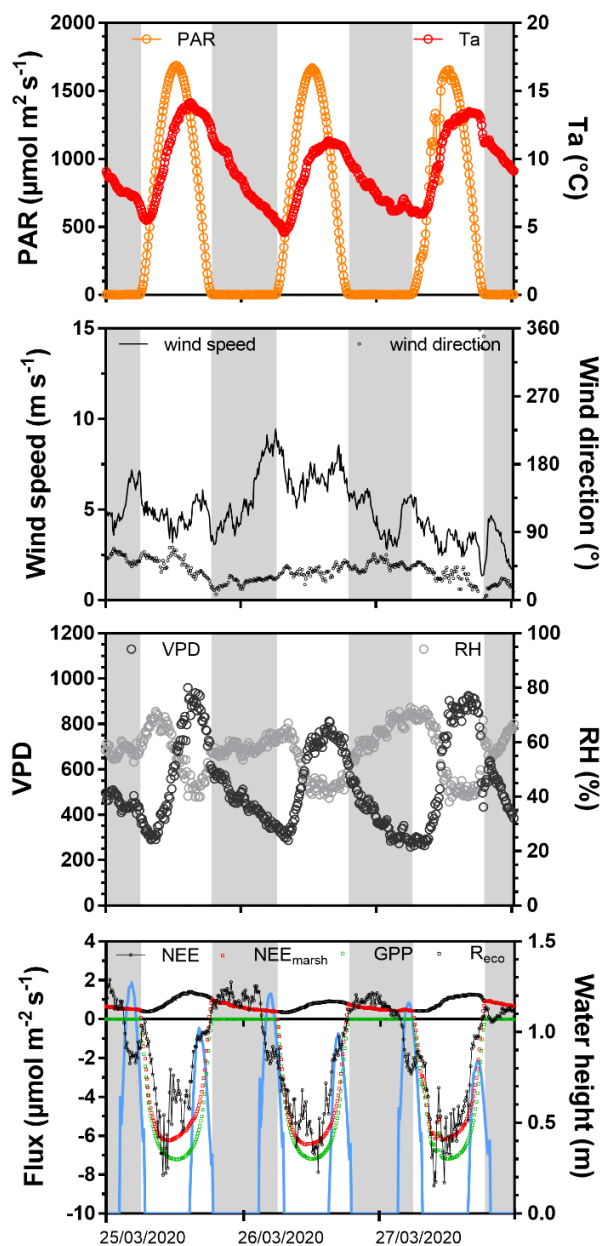

Fig. S2. Temporal variations of PAR ( $\mu\text{mol m}^{-2} \text{s}^{-1}$ ), Ta ( $^{\circ}\text{C}$ ), wind speed ( $\text{m s}^{-1}$ ), wind direction ( $^{\circ}$ ), VPD (Pa), RH (%), measured NEE, estimated NEE<sub>marsh</sub>, estimated GPP and estimated Reco ( $\mu\text{mol CO}_2 \text{m}^{-2} \text{s}^{-1}$ ) and water height (Hw, m) values measured at a 10-minute frequency in early spring 2020 from 25/03/2020 (00:00 am) to 27/03/2020 (23:50 pm). Grey areas correspond to night-time periods ( $\text{PAR} \leq 10 \mu\text{mol m}^{-2} \text{s}^{-1}$ ). This temporal window in March 2020 was chosen to highlight the marsh CO<sub>2</sub> sink during night-time immersion, the rapid decrease of CO<sub>2</sub> uptake during daytime immersion and the negative correlation between NEE and PAR.

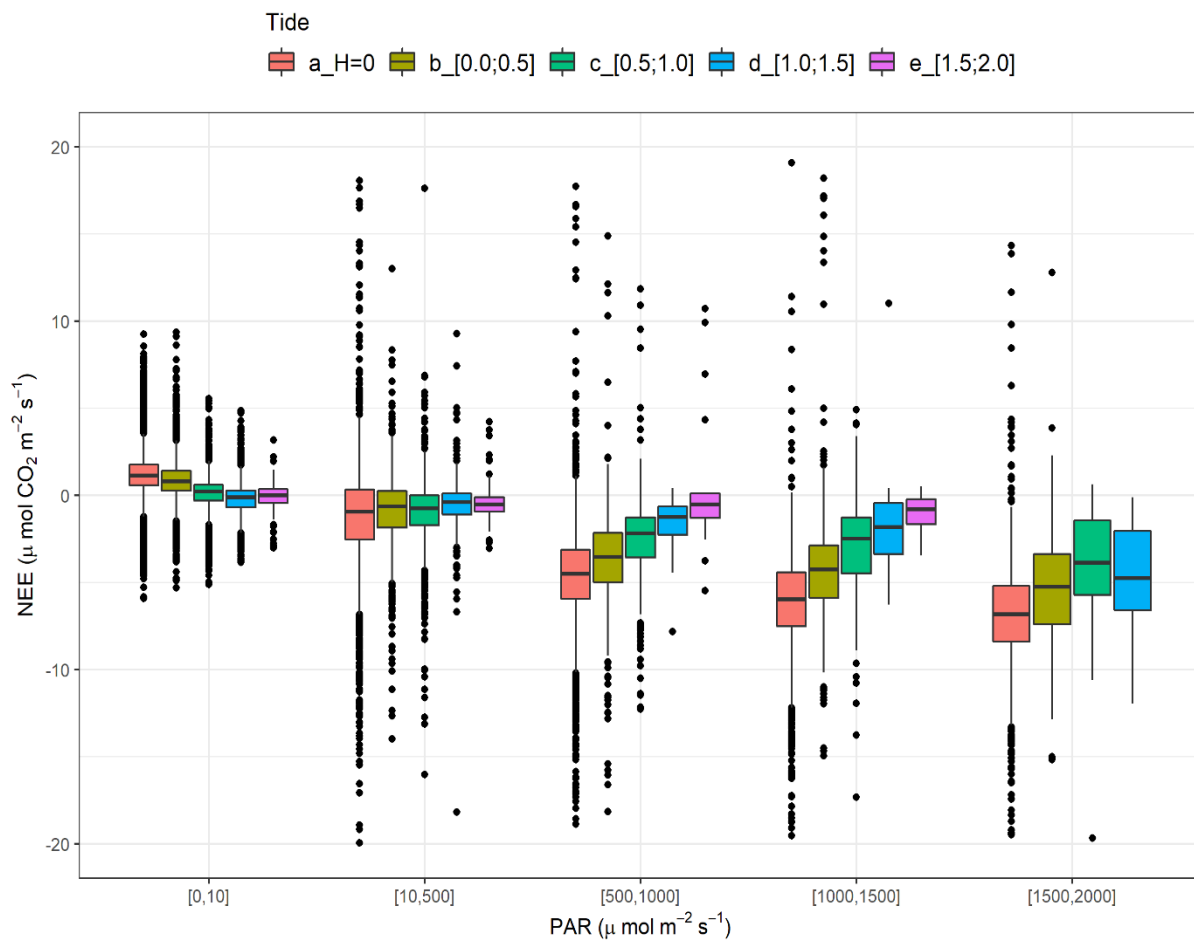

**Fig. S3. Diurnal/tidal variations (boxplots) of NEE fluxes ( $\mu\text{mol CO}_2 \text{ m}^{-2} \text{ s}^{-1}$ ) during marsh emersion (Hw = 0 m) and at four water level ranges of 0.5 m within five PAR groups. The five PAR groups are  $0 < \text{PAR} \leq 10$  (night),  $10 < \text{PAR} \leq 500$ ,  $500 < \text{PAR} \leq 1000$ ,  $1000 < \text{PAR} \leq 1500$ ,  $1500 < \text{PAR} \leq 2000 \mu\text{mol m}^{-2} \text{ s}^{-1}$ .**
